# Supplementary material for: Positive Effects of Soy Lecithin-Derived Phosphatidylserine plus Phosphatidic Acid on Memory, Cognition, Daily Functioning, and Mood in Elderly Patients with Alzheimer’s Disease and Dementia
Source: PubMed Central journal article supplement — Adv Ther. 2014 Nov 21;31(12):1247–62. doi: 10.1007/s12325-014-0165-1 (PMC4271139; doi:10.1007/s12325-014-0165-1), 2014-11-21

**Fig. S1. Change of mental state by components of cognitive state.** The number of patients (analyzed in a historical prospective manner) who experienced deterioration, no change or improvement after 3–6 months or after 12 months of PS+PA supplementation is indicated for each cognitive subcategory. *PA* Phosphatidic acid, *PS* Phosphatidylserine.

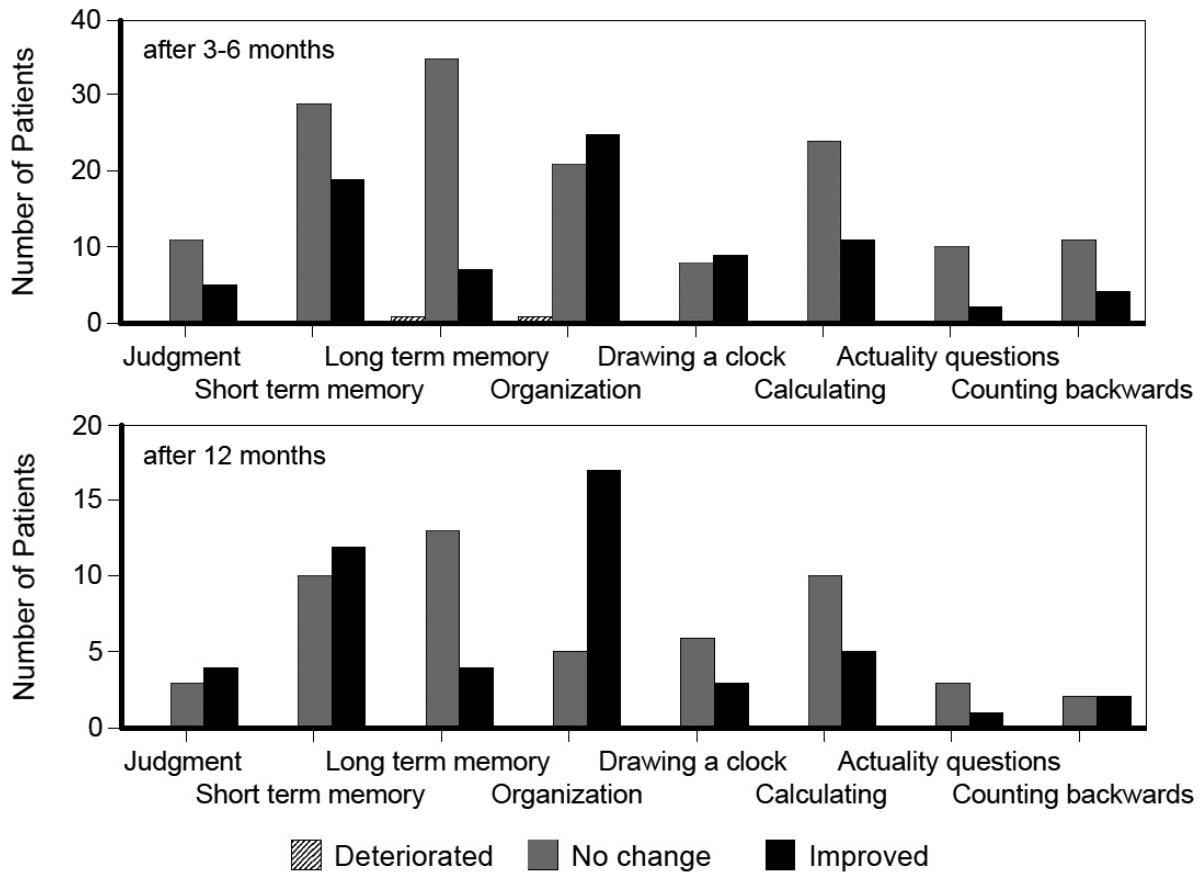

Supplement: 12325_2014_165_MOESM1_ESM.pdf [file 12325_2014_165_MOESM1_ESM.pdf]
