# Supplementary material for: Positive Effects of Soy Lecithin-Derived Phosphatidylserine plus Phosphatidic Acid on Memory, Cognition, Daily Functioning, and Mood in Elderly Patients with Alzheimer’s Disease and Dementia
Source: PubMed Central journal article supplement — Adv Ther. 2014 Nov 21;31(12):1247–62. doi: 10.1007/s12325-014-0165-1 (PMC4271139; doi:10.1007/s12325-014-0165-1), 2014-11-21
Supplement: 12325_2014_165_MOESM2_ESM.pdf [file 12325_2014_165_MOESM2_ESM.pdf]

- We report previously unpublished, early studies performed with soy lecithin-derived phosphatidylserine (PS) and phosphatidic acid (PA), using 300 mg PS + 240 mg PA in lecithin per day.
- PS is shown to be efficiently absorbed after oral consumption.
- A three-month double-blind, placebo-controlled study with PS+PA in 72 functioning, non-depressive elderly demonstrated a statistically significant positive influence of PS+PA on memory, mood, and cognition in pre-post comparison.
- A two-month randomized, double-blind, placebo-controlled study with PS+PA in 96 Alzheimer's disease patients demonstrated a stabilizing effect of PS+PA on daily functioning, emotional state, and self-reported general condition; no negative side effects were observed.
- Altogether our results suggest that PS+PA can support memory and cognitive function, which is especially apparent in those who have developed cognition deficiencies.

This summary slide represents the opinions of the authors. Sponsorship for this study was funded by Lipogen Ltd. (Haifa, Israel). For a full list of acknowledgments and conflicts of interest for all authors of this article, please see the full text online. Copyright © The Author(s) 2014. Creative Commons Attribution Noncommercial License (CC BY-NC).
